# Supplementary material for: Graphene:silver nanowire composite transparent electrode based flexible organic solar cells with 13.4% efficiency
Source: Royal Society of Chemistry journal article supplement (doi:10.1039/c9ta07493g), 2019-01-01
Supplement: c9ta07493g1.pdf [file c9ta07493g1.pdf]

## Experimental section

### 1.1 Materials

Materials: PM6, Y6, PDNIO were purchased from Solarmer Materials Inc., Beijing. 1-chloronaphthalene (CN) was purchased from TCI, Shanghai. Conductive PEDOT:PSS aqueous (named PH1000 and Clevios PVP Al 4083) were purchased from Heraeus corporation (PH1000 with a solid content of 1.0-1.3% and a specific conductivity of 850 S/cm, and PEDOT:PSS(4083) with a solid content of 1.5-1.7% and a specific conductivity of 3980 S/cm). GR&AgNWs flexible transparent conductive film purchased from Vigon technologies. Surfactant-polyethylene glycol 2,5,8,11-tetramethyl-6-dodecyne-5,8-diol ether (PEG-TmDD, Superwet-340, surfy-Chem T&D).

### 1.2 Fabrication of photovoltaic devices:

GR&AgNWs films on PET substrates were gently scrubbed with a cotton dipping ethanol. The ITO films based on glass and PET were ultrasonically cleaned with soapy water, deionized water, acetone, and isopropanol respectively for 20 min. Then, PH1000 aqueous with 5 wt% Dimethyl sulfoxide (DMSO) and 0.5 vol% PEG-TmDD was spin coated on top of GR&AgNWs film PET-based filtered with 0.45  $\mu\text{m}$  syringe filter, and change the thickness by adjusting the spin coating speed. PH1000 aqueous with 0.45  $\mu\text{m}$  syringe was also spin-coated with 1500 r/min for 60s on PET substrate as an electrode. And then thermal annealing was followed at 90 °C for 20 min.

Next, prior to the spin-coating of PEDOT:PSS aqueous (Clevios PVP Al 4083), The ITO films were treated by UV-plasma for 20 minutes. Then, PEDOT:PSS aqueous (Clevios PVP Al 4083) were spin-coated onto the surface of PH1000, ITO, AgNWs, and graphene films by spin-coating at 3000 rpm for 60 s as an anode interface layer and annealed at 90 °C for 20 min as an interface layer. the PEDOT:PSS aqueous (Clevios PVP Al 4083) were conducted again mentioned above in the case of double buffer layer.

Subsequently, the active layer of PM6:Y6 (1:1.2, weight ratio) solution with the total concentration of 16 mg/ml dissolved in chloroform, 0.5 vol% 1-chloronaphthalene (CN) as solvent additive was spin-coated at 2500 rpm for 60 s onto the Clevios PVP Al 4083 layer in the N<sub>2</sub>-filled glove box and annealed at 110 °C for 10 min. The thickness of the PM6:Y6 active layer is about 120 nm. Next, PDINO dissolved in methanol (1.5 mg/ml) was spin-coated on the active layer at 3000 rpm for 60 s as a cathode interface layer (thickness: 10 nm). Finally, the top electrodes Al (thickness: 100 nm) were thermally evaporated at a base pressure of about 10<sup>-5</sup> mbar using Vacuum evaporation system under a shadow mask providing an effective area of 4.0 mm<sup>2</sup>.

## 2.1 Characterization

Sheet resistance of films was measured by the Vander Pauw four-point probe method using Keithley 2400 source meter. Transmittance and reflectance spectra were performed on a spectrophotometer (Lambda950, Perkin-Elmer). Under illumination of AM 1.5 G, 100 mW/cm<sup>2</sup> and in the dark, the J-V characteristics were tested by the source meter (Keithley 2440) controlled by the program (Newport-Oriel Sol3A 450W) in the N<sub>2</sub>-filled glove box. The EQE spectra were detected by a NewportOriel® IQE 200™ under monochromatic illumination. And a standard Si solar cell was performed as a calibration. Ultraviolet photoelectron spectroscopy (Kratos ULTRA DLD UPS/XPS system) was used to characterize of work function (WF). The experiments were performed at a base pressure of 10<sup>-10</sup> mbar using monochromatic Al (Kα) X-rays (1486.6 eV) and He I (21.22 eV) source, respectively. The thickness of the active layer was obtained with computer-controlled Dektak 150 Veeco. The surface morphologies provided by atomic force microscope (Veeco Dimension 3100V).

**Table S1** Key parameters of flexible OSCs on PET with the devices based on PH1000, AgNWs, and Graphene electrode.

| Electrode           | $V_{oc}$ [V] | $J_{sc}$ [mA/cm <sup>2</sup> ] | FF [%] | PCE <sub>max</sub> [%] |
|---------------------|--------------|--------------------------------|--------|------------------------|
| PH1000/ PEDOT:PSS   | 0.827        | 16.68                          | 52.84  | 7.29                   |
| AgNWs/PEDOT:PSS     | 0.794        | 6.46                           | 24.83  | 1.27                   |
| Graphene/ PEDOT:PSS | 0.824        | 15.30                          | 42.89  | 5.40                   |

**Table S2** Key parameters of flexible OSCs based on ITO/PET devices without and with surfactant doped into interface layer.

| Electrode                | $V_{oc}$ [V] | $J_{sc}$ [mA/cm <sup>2</sup> ] | FF [%] | PCE <sub>max</sub> [%] |
|--------------------------|--------------|--------------------------------|--------|------------------------|
| ITO/ PEDOT:PSS           | 0.832        | 20.31                          | 66.77  | 11.28                  |
| ITO/PEDOT:PSS (PEG-TmDD) | 0.828        | 17.06                          | 43.18  | 6.10                   |

**Table S3** Key parameters of flexible OSCs with different PEDOT:PSS thickness based on GR&AgNWs/PH1000(160 nm) electrode.

| Electrode                                       | PEDOT:PSS Thickness(nm) | $V_{oc}$ [V] | $J_{sc}$ [mA/cm <sup>2</sup> ] | FF [%] | PCE <sub>max</sub> [%] |
|-------------------------------------------------|-------------------------|--------------|--------------------------------|--------|------------------------|
| GR&AgNWs/PH1000 (160nm) <sub>1</sub> /PEDOT:PSS | 40                      | 0.805        | 20.47                          | 67.30  | 11.08                  |
|                                                 | 70                      | 0.815        | 22.05                          | 64.28  | 11.55                  |
|                                                 | 100                     | 0.816        | 21.05                          | 66.27  | 11.38                  |

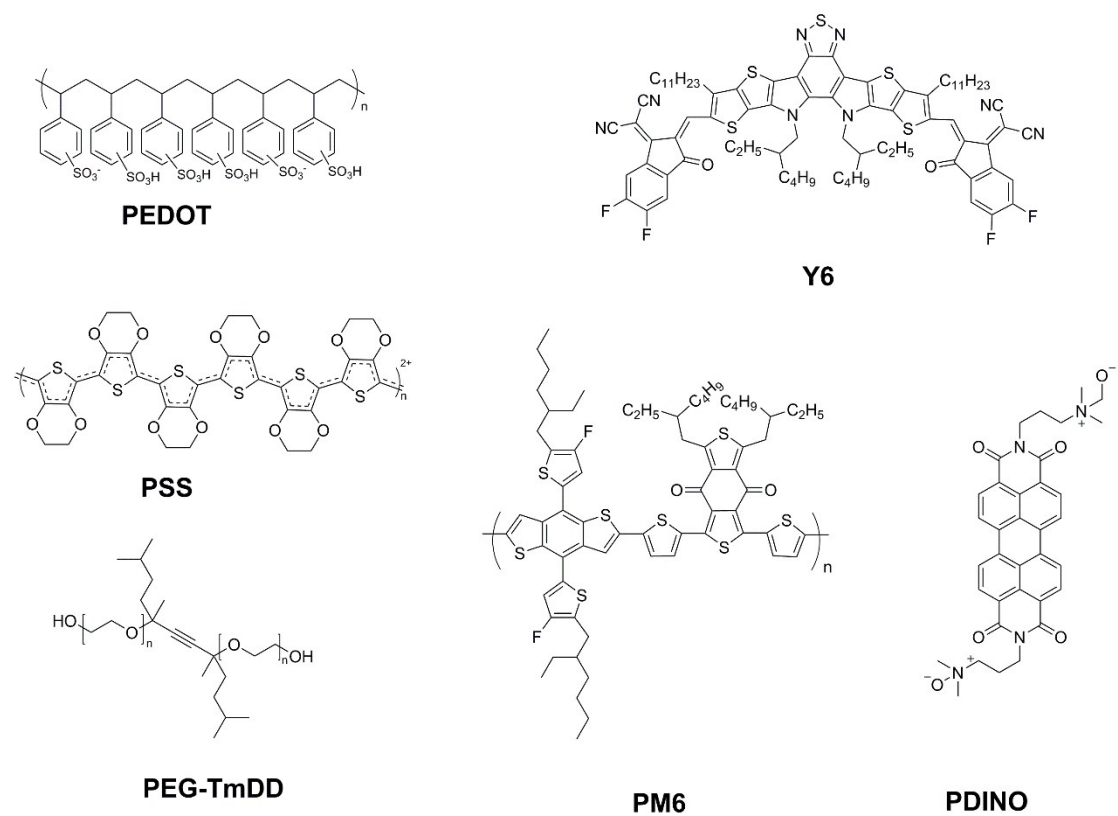

**Figure S1.** Molecular structures of PM6, Y6, PEG-TmDD, PEDOT:PSS and PDINO.

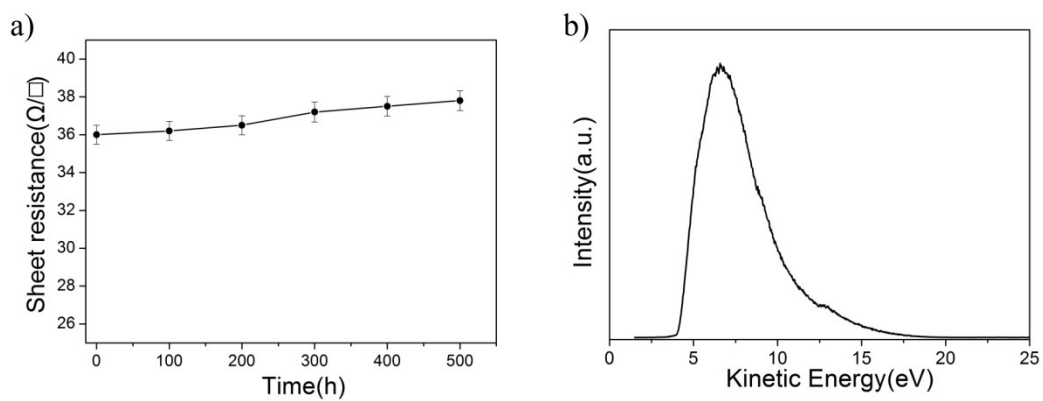

**Figure S2.** a) The stability of GR&AgNWs electrode's sheet resistance. b) The UPS spectra of GR&AgNWs film.

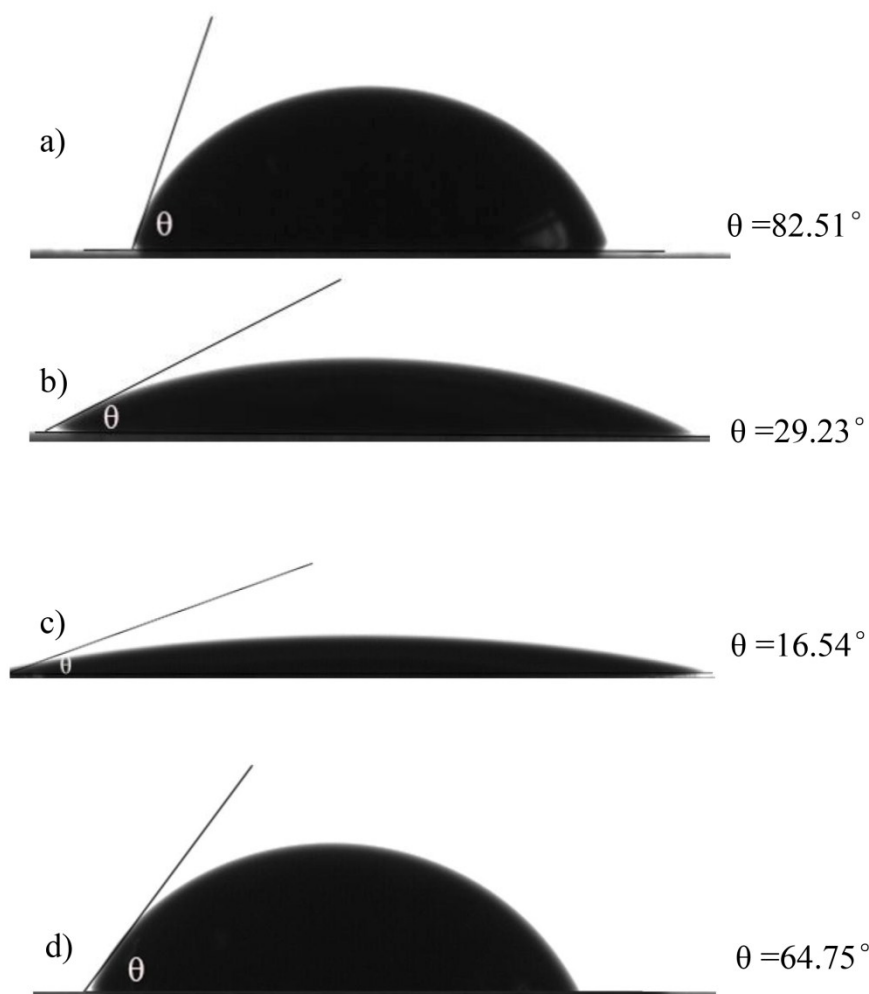

**Figure S3.** a,b) Water contact angle images of PH1000 and PEG-TmDD (surfactant ) droplets on GR&AgNWs film respectively. c,d) Wettability characteristics of PEDOT:PSS droplets on PH1000 (doped with PEG-TmDD) and one-layer of PEDOT:PSS respectively. All substrates are PET.

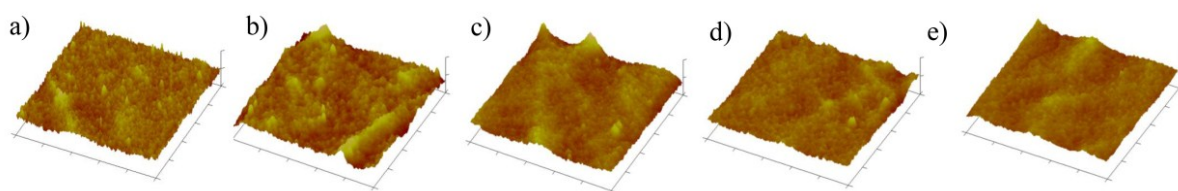

**Figure S4.** 5×5 μm<sup>2</sup> AFM 3D surface plot. a) PH1000 with 160nm thickness. b) one PEDOT:PSS and c) double PEDOT:PSS based on hybrid electrodes. and the active layer based on d) GR&AgNWs/PH1000/ PEDOT:PSS<sup>1</sup>. e) GR&AgNWs/PH1000/ PEDOT:PSS<sup>2</sup>.

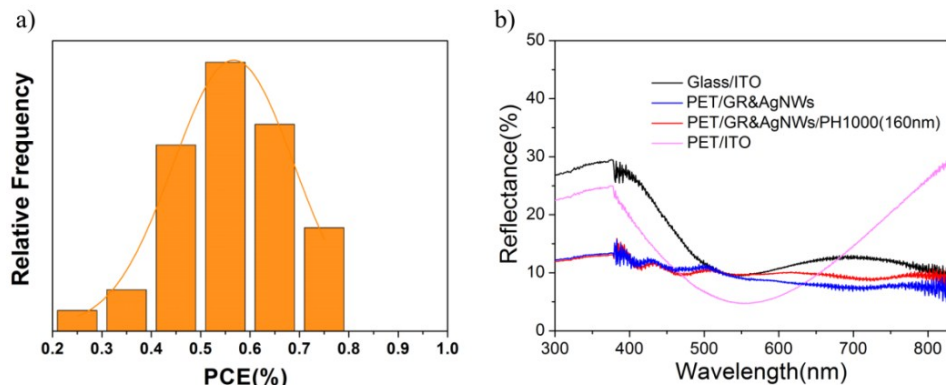

**Figure S5.** a) Histogram of the PCE measurements for 40 devices based on GR&AgNWs electrode. b) Reflectance spectra of GR&AgNWs, GR&AgNWs/PH1000 (160 nm), and ITO based on glass and PET. (excluding the substrate).

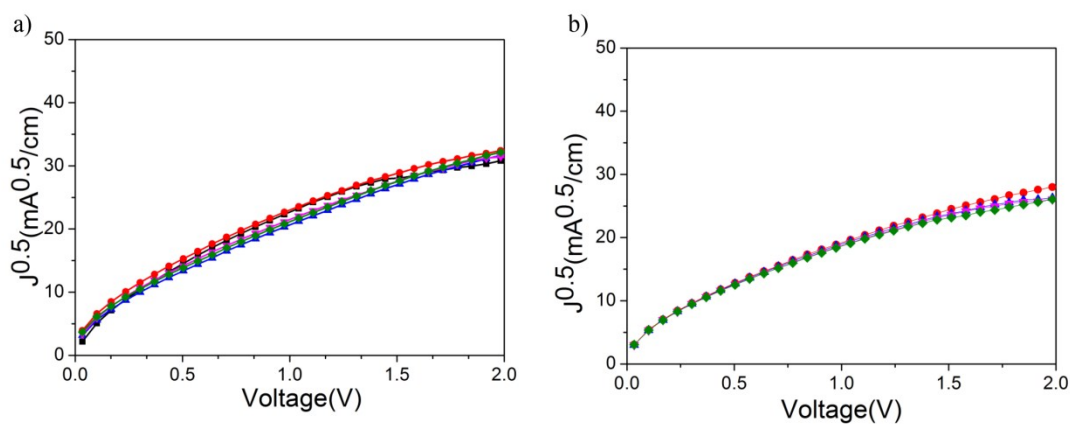

**Figure S6.** Electric field dependence of the  $J^{0.5}$  of the hole-only flexible devices: a) One buffer layer PEDOT:PSS<sup>1</sup>, b) Double buffer layer PEDOT:PSS<sup>2</sup> (both are based on GR&AgNWs/PH1000 (160 nm) electrode). Measure five devices' average to verify the values of hole mobility.

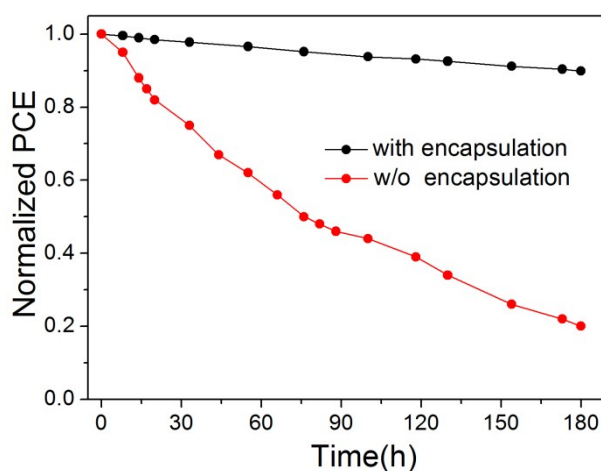

**Figure S7.** The stability of devices PM6:Y6 based with encapsulation and without encapsulation on GR&AgNWs/PH1000 electrode.

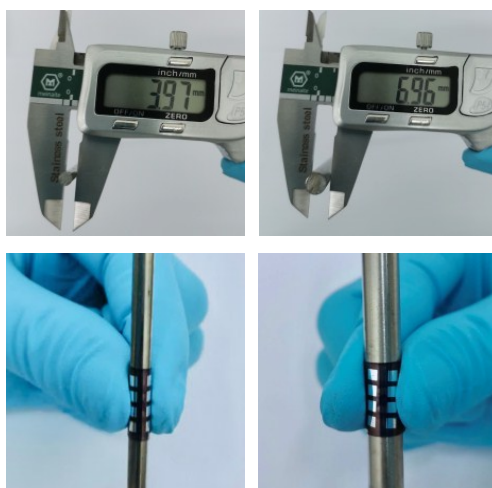

**Figure S8.** The partial image ( $r=2, 3.5$  mm) of bending test and corresponding curved radius.

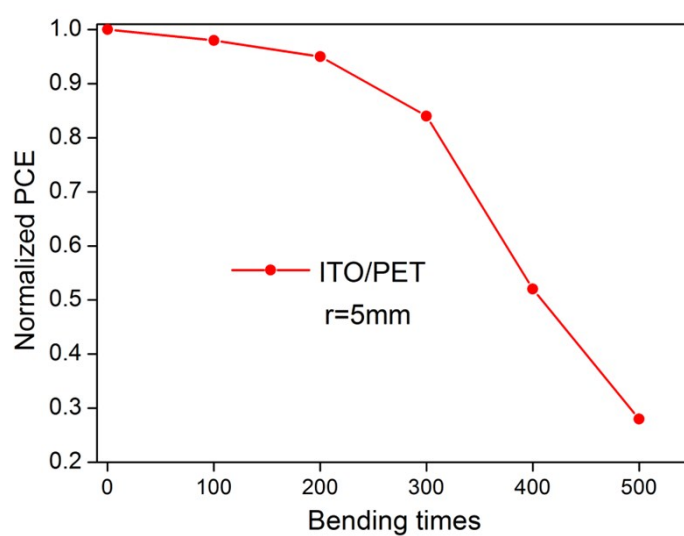

**Figure S9.** Normalized PCEs of flexible OSCs based on ITO electrode tested in bending radius of 5 mm.
